# Supplementary material for: Controls of fluorescent tracer retention by soils and sediments
Source: Copernicus journal article supplement (doi:10.5194/hess-2019-229), 2019-05-17
Supplement: Supplementary file 1 [file hess-2019-229-supplement.pdf]

# Supplement to "Controls of fluorescent tracer retention by soils and sediments" by Bork et. al

Marcus Bork<sup>1,2</sup>, Jens Lange<sup>2</sup>, Markus Graf-Rosenfellner<sup>1</sup>, and Friederike Lang<sup>1</sup>

<sup>1</sup>Soil Ecology, Faculty of Environment and Natural Resources, University of Freiburg, Freiburg, Germany

<sup>2</sup>Hydrology, Faculty of Environment and Natural Resources, University of Freiburg, Freiburg, Germany

**Table S1.** Residual water contents of samples from top- and subsoil, sediment and clay mineral (difference between at 105 °C dried and air-dried sample. The values are the means of three repetitions +/- standard deviation.

| Substrate       | Treatment | Water Content<br>(wt% ± wt%) |
|-----------------|-----------|------------------------------|
| Topsoil         | high OC   | 2.16 ± 0.02                  |
| Topsoil         | low OC    | 1.17 ± 0.03                  |
| Subsoil         | high OC   | 2.11 ± 0.01                  |
| Subsoil         | low OC    | 1.85 ± 0.36                  |
| Sediment        | Clay0     | 0.14 ± 0.01                  |
| Montmorillonite | -         | 4.11 ± 0.04                  |

**Table S2.** Mean concentrations and standard deviations (n = 3) from batch experiment of topsoil samples. Where the standard deviation is missing only on single measurement was performed. Data of treatment high OC at pH 5.5, 6.5 and 7.5 were used in Fig.2. Data from treatments high OC and low OC at pH 7.5 were used in Fig.4.

| Substrate | Treatment | pH<br>(-) | $c_{step}^a$ | $c_{initial}$<br>( $\mu\text{g} \cdot \text{L}^{-1}$ ) |     | $c_{solution}$<br>( $\mu\text{g} \cdot \text{L}^{-1}$ ) |                  | $q_{adsorbed}$<br>( $\mu\text{g} \cdot \text{kg}^{-1}$ ) |                  |
|-----------|-----------|-----------|--------------|--------------------------------------------------------|-----|---------------------------------------------------------|------------------|----------------------------------------------------------|------------------|
|           |           |           |              | UR                                                     | SRB | UR                                                      | SRB              | UR                                                       | SRB              |
|           |           |           |              |                                                        |     |                                                         |                  |                                                          |                  |
| Topsoil   | high OC   | 5.5       | c1           | 20                                                     | 400 | $1.3 \pm 0.1$                                           | $135.1 \pm 11.0$ | $93 \pm 0.6$                                             | $1325 \pm 55.2$  |
| Topsoil   | high OC   | 5.5       | c2           | 25                                                     | 500 | 1.7                                                     | 194.2            | 116                                                      | 1529             |
| Topsoil   | high OC   | 5.5       | c3           | 30                                                     | 600 | 2.1                                                     | 243.1            | 139                                                      | 1784             |
| Topsoil   | high OC   | 5.5       | c4           | 35                                                     | 700 | 2.4                                                     | 283.9            | 163                                                      | 2081             |
| Topsoil   | high OC   | 5.5       | c5           | 40                                                     | 800 | 2.8                                                     | 338.6            | 186                                                      | 2307             |
| Topsoil   | high OC   | 5.5       | c6           | 45                                                     | 900 | $2.6 \pm 0.4$                                           | $378.5 \pm 18.5$ | $212 \pm 2.1$                                            | $2608 \pm 92.4$  |
| Topsoil   | high OC   | 6.5       | c1           | 20                                                     | 400 | $3.4 \pm 0.5$                                           | $165.8 \pm 3.1$  | $83 \pm 2.4$                                             | $1171 \pm 15.6$  |
| Topsoil   | high OC   | 6.5       | c2           | 25                                                     | 500 | 3.6                                                     | 230.7            | 107                                                      | 1347             |
| Topsoil   | high OC   | 6.5       | c3           | 30                                                     | 600 | 3.6                                                     | 266.7            | 132                                                      | 1666             |
| Topsoil   | high OC   | 6.5       | c4           | 35                                                     | 700 | $4.3 \pm 0.1$                                           | $331.8 \pm 2.5$  | $153 \pm 0.6$                                            | $1841 \pm 12.5$  |
| Topsoil   | high OC   | 6.5       | c5           | 40                                                     | 800 | 5.1                                                     | 389.5            | 174                                                      | 2053             |
| Topsoil   | high OC   | 6.5       | c6           | 45                                                     | 900 | $5.5 \pm 0.9$                                           | $435.0 \pm 24.6$ | $198 \pm 4.3$                                            | $2325 \pm 123.0$ |
| Topsoil   | high OC   | 7.5       | c1           | 20                                                     | 400 | $13.5 \pm 0.8$                                          | $229.6 \pm 8.8$  | $33 \pm 4.2$                                             | $871 \pm 44.2$   |
| Topsoil   | high OC   | 7.5       | c2           | 25                                                     | 500 | $15.9 \pm 0.5$                                          | $289.9 \pm 14.5$ | $47 \pm 2.5$                                             | $1074 \pm 72.3$  |
| Topsoil   | high OC   | 7.5       | c3           | 30                                                     | 600 | $18.5 \pm 0.6$                                          | $369.3 \pm 7.0$  | $59 \pm 3.1$                                             | $1179 \pm 35.1$  |
| Topsoil   | high OC   | 7.5       | c4           | 35                                                     | 700 | $23.0 \pm 2.6$                                          | $425.0 \pm 14.5$ | $62 \pm 13.1$                                            | $1406 \pm 72.5$  |
| Topsoil   | high OC   | 7.5       | c5           | 40                                                     | 800 | $24.9 \pm 0.5$                                          | $503.6 \pm 3.4$  | $77 \pm 2.3$                                             | $1514 \pm 16.9$  |
| Topsoil   | high OC   | 7.5       | c6           | 45                                                     | 900 | $28.4 \pm 1.8$                                          | $540.0 \pm 15.4$ | $85 \pm 9.0$                                             | $1840 \pm 77.1$  |
| Topsoil   | low OC    | 7.5       | c1           | 20                                                     | 400 | $17.4 \pm 0.6$                                          | $128.2 \pm 6.8$  | $13 \pm 2.8$                                             | $1375 \pm 33.8$  |
| Topsoil   | low OC    | 7.5       | c2           | 25                                                     | 500 | $21.3 \pm 0.2$                                          | $149.6 \pm 3.2$  | $19 \pm 0.9$                                             | $1773 \pm 15.9$  |
| Topsoil   | low OC    | 7.5       | c3           | 30                                                     | 600 | $27.7 \pm 0.7$                                          | $201.9 \pm 11.1$ | $12 \pm 3.3$                                             | $2014 \pm 55.3$  |
| Topsoil   | low OC    | 7.5       | c4           | 35                                                     | 700 | $30.1 \pm 0.6$                                          | $231.7 \pm 4.4$  | $25 \pm 3.2$                                             | $2369 \pm 21.9$  |
| Topsoil   | low OC    | 7.5       | c5           | 40                                                     | 800 | $34.1 \pm 0.1$                                          | $274.7 \pm 4.8$  | $30 \pm 0.5$                                             | $2658 \pm 24.1$  |
| Topsoil   | low OC    | 7.5       | c6           | 45                                                     | 900 | $40.3 \pm 0.1$                                          | $308.1 \pm 3.7$  | $24 \pm 0.3$                                             | $2994 \pm 18.7$  |

<sup>a</sup> Concentration step of initial tracer addition.

**Table S3.** Mean concentrations and standard deviations (n = 3) from batch experiment of subsoil samples. Where the standard deviation is missing only on single measurement was performed. Data of treatment high OC at pH 5.5, 6.5 and 7.5 were used in Fig.2. Data from treatments high OC and low OC at pH 7.5 were used in Fig.4.

| Substrate | Treatment | pH<br>(-) | $c_{step}^a$ | $c_{initial}$<br>( $\mu\text{g} \cdot \text{L}^{-1}$ ) |     | $c_{solution}$<br>( $\mu\text{g} \cdot \text{L}^{-1}$ ) |                  | $q_{adsorbed}$<br>( $\mu\text{g} \cdot \text{kg}^{-1}$ ) |                 |
|-----------|-----------|-----------|--------------|--------------------------------------------------------|-----|---------------------------------------------------------|------------------|----------------------------------------------------------|-----------------|
|           |           |           |              | UR                                                     | SRB | UR                                                      | SRB              | UR                                                       | SRB             |
|           |           |           |              |                                                        |     |                                                         |                  |                                                          |                 |
| Subsoil   | high OC   | 5.5       | c1           | 20                                                     | 400 | 2.0                                                     | 9.4              | 90                                                       | 1953            |
| Subsoil   | high OC   | 5.5       | c2           | 25                                                     | 500 | 2.8                                                     | 27.2             | 111                                                      | 2364            |
| Subsoil   | high OC   | 5.5       | c3           | 30                                                     | 600 | 4.1                                                     | 58.0             | 129                                                      | 2710            |
| Subsoil   | high OC   | 5.5       | c4           | 35                                                     | 700 | 4.4                                                     | 70.5             | 153                                                      | 3148            |
| Subsoil   | high OC   | 5.5       | c5           | 40                                                     | 800 | 5.1                                                     | 92.7             | 174                                                      | 3536            |
| Subsoil   | high OC   | 5.5       | c6           | 45                                                     | 900 | 5.7                                                     | 110.2            | 196                                                      | 3949            |
| Subsoil   | high OC   | 6.5       | c1           | 20                                                     | 400 | $3.8 \pm 0$                                             | $26.9 \pm 0.9$   | $81 \pm 0.01$                                            | $1865 \pm 4.3$  |
| Subsoil   | high OC   | 6.5       | c2           | 25                                                     | 500 | $5.5 \pm 0.02$                                          | $60.3 \pm 0.8$   | $97 \pm 0.1$                                             | $2199 \pm 4.0$  |
| Subsoil   | high OC   | 6.5       | c3           | 30                                                     | 600 | 7.3                                                     | 91.8             | 114                                                      | 2541            |
| Subsoil   | high OC   | 6.5       | c4           | 35                                                     | 700 | 7.4                                                     | 107.0            | 138                                                      | 2965            |
| Subsoil   | high OC   | 6.5       | c5           | 40                                                     | 800 | 9.9                                                     | 146.9            | 151                                                      | 3265            |
| Subsoil   | high OC   | 6.5       | c6           | 45                                                     | 900 | 9.9                                                     | 161.5            | 176                                                      | 3692            |
| Subsoil   | high OC   | 7.5       | c1           | 20                                                     | 400 | $12.0 \pm 0.8$                                          | $86.7 \pm 5.9$   | $41 \pm 4.0$                                             | $1600 \pm 29.7$ |
| Subsoil   | high OC   | 7.5       | c2           | 25                                                     | 500 | $15.1 \pm 0.2$                                          | $116.5 \pm 1.9$  | $50 \pm 1.0$                                             | $1959 \pm 9.3$  |
| Subsoil   | high OC   | 7.5       | c3           | 30                                                     | 600 | $18.8 \pm 0.3$                                          | $149.9 \pm 3.2$  | $57 \pm 1.3$                                             | $2299 \pm 15.9$ |
| Subsoil   | high OC   | 7.5       | c4           | 35                                                     | 700 | $23.1 \pm 0.7$                                          | $193.0 \pm 8.4$  | $61 \pm 3.5$                                             | $2590 \pm 42.0$ |
| Subsoil   | high OC   | 7.5       | c5           | 40                                                     | 800 | $25.3 \pm 1.0$                                          | $224.3 \pm 7.7$  | $75 \pm 4.8$                                             | $2940 \pm 38.7$ |
| Subsoil   | high OC   | 7.5       | c6           | 45                                                     | 900 | $29.2 \pm 0.2$                                          | $261.5 \pm 0.5$  | $80 \pm 1.2$                                             | $3261 \pm 2.5$  |
| Subsoil   | low OC    | 7.5       | c1           | 20                                                     | 400 | $12.7 \pm 0.2$                                          | $54.1 \pm 2.8$   | $37 \pm 0.8$                                             | $1762 \pm 13.8$ |
| Subsoil   | low OC    | 7.5       | c2           | 25                                                     | 500 | $16.7 \pm 0.7$                                          | $77.6 \pm 3.8$   | $42 \pm 3.5$                                             | $2152 \pm 18.8$ |
| Subsoil   | low OC    | 7.5       | c3           | 30                                                     | 600 | $20.4 \pm 0.3$                                          | $99.7 \pm 1.5$   | $49 \pm 1.7$                                             | $2549 \pm 7.7$  |
| Subsoil   | low OC    | 7.5       | c4           | 35                                                     | 700 | $24.0 \pm 0.3$                                          | $124.3 \pm 0.6$  | $56 \pm 1.3$                                             | $2933 \pm 3.2$  |
| Subsoil   | low OC    | 7.5       | c5           | 40                                                     | 800 | $25.3 \pm 1.7$                                          | $136.2 \pm 9.6$  | $75 \pm 8.5$                                             | $3382 \pm 48.1$ |
| Subsoil   | low OC    | 7.5       | c6           | 45                                                     | 900 | $30.6 \pm 1.3$                                          | $177.3 \pm 15.0$ | $73 \pm 6.3$                                             | $3682 \pm 74.9$ |

<sup>a</sup> Concentration step of initial tracer addition.

**Table S4.** Continuation: Mean concentrations and standard deviations (n = 3) from batch experiment of sediment samples. Where the standard deviation is missing only on single measurement was performed. Data of treatment Clay0 at pH 5.5, 6.5 and 7.5 were used in Fig.2. Data from treatments Clay0, Clay1 and Clay2 at pH 7.5 were used in Fig.4.

| Substrate | Treatment | pH<br>(-) | $c_{step}^a$ | $c_{initial}$<br>( $\mu\text{g} \cdot \text{L}^{-1}$ ) |     | $c_{solution}$<br>( $\mu\text{g} \cdot \text{L}^{-1}$ ) |                  | $q_{adsorbed}$<br>( $\mu\text{g} \cdot \text{kg}^{-1}$ ) |                 |
|-----------|-----------|-----------|--------------|--------------------------------------------------------|-----|---------------------------------------------------------|------------------|----------------------------------------------------------|-----------------|
|           |           |           |              | UR                                                     | SRB | UR                                                      | SRB              | UR                                                       | SRB             |
| Sediment  | Clay0     | 5.5       | c1           | 20                                                     | 400 | $18.8 \pm 0.8$                                          | $321.7 \pm 14.3$ | $6 \pm 3.8$                                              | $391 \pm 71.3$  |
| Sediment  | Clay0     | 5.5       | c2           | 25                                                     | 500 | 23.9                                                    | 447.0            | 5                                                        | 265             |
| Sediment  | Clay0     | 5.5       | c3           | 30                                                     | 600 | 28.5                                                    | 541.0            | 8                                                        | 295             |
| Sediment  | Clay0     | 5.5       | c4           | 35                                                     | 700 | 33.2                                                    | 638.1            | 9                                                        | 309             |
| Sediment  | Clay0     | 5.5       | c5           | 40                                                     | 800 | 38.5                                                    | 749.7            | 8                                                        | 252             |
| Sediment  | Clay0     | 5.5       | c6           | 45                                                     | 900 | $41.4 \pm 0.8$                                          | $844.0 \pm 20.7$ | $18 \pm 4.1$                                             | $280 \pm 103.3$ |
| Sediment  | Clay0     | 6.5       | c1           | 20                                                     | 400 | $18.9 \pm 0.1$                                          | $343.5 \pm 4.1$  | $6 \pm 0.6$                                              | $283 \pm 20.4$  |
| Sediment  | Clay0     | 6.5       | c2           | 25                                                     | 500 | 24.8                                                    | 463.8            | 1                                                        | 181             |
| Sediment  | Clay0     | 6.5       | c3           | 30                                                     | 600 | 30.3                                                    | 579.8            | 0                                                        | 101             |
| Sediment  | Clay0     | 6.5       | c4           | 35                                                     | 700 | 34.1                                                    | 660.1            | 5                                                        | 199             |
| Sediment  | Clay0     | 6.5       | c5           | 40                                                     | 800 | 40.0                                                    | 759.4            | 0                                                        | 203             |
| Sediment  | Clay0     | 6.5       | c6           | 45                                                     | 900 | $44.4 \pm 1.9$                                          | $890.7 \pm 35.5$ | $3 \pm 9.3$                                              | $46 \pm 177.5$  |
| Sediment  | Clay0     | 7.5       | c1           | 20                                                     | 400 | $20.6 \pm 0.2$                                          | $343.1 \pm 5.2$  | 0                                                        | $285 \pm 26.2$  |
| Sediment  | Clay0     | 7.5       | c2           | 25                                                     | 500 | $25.7 \pm 0.4$                                          | $453.7 \pm 13.0$ | 0                                                        | $232 \pm 65.2$  |
| Sediment  | Clay0     | 7.5       | c3           | 30                                                     | 600 | $31.2 \pm 0.5$                                          | $540.9 \pm 12.0$ | 0                                                        | $296 \pm 60.0$  |
| Sediment  | Clay0     | 7.5       | c4           | 35                                                     | 700 | $34.8 \pm 0.5$                                          | $587.3 \pm 14.0$ | $1 \pm 2.4$                                              | $564 \pm 70.1$  |
| Sediment  | Clay0     | 7.5       | c5           | 40                                                     | 800 | $39.1 \pm 0.1$                                          | $675.0 \pm 6.2$  | $4 \pm 0.6$                                              | $626 \pm 30.8$  |
| Sediment  | Clay0     | 7.5       | c6           | 45                                                     | 900 | $45.1 \pm 0.7$                                          | $748.4 \pm 5.0$  | $0 \pm 3.3$                                              | $759 \pm 24.9$  |

<sup>a</sup> Concentration step of initial tracer addition.

**Table S4.** Continuation: Mean concentrations and standard deviations (n = 3) from batch experiment of sediment samples. Where the standard deviation is missing only on single measurement was performed. Data of treatment Clay0 at pH 5.5, 6.5 and 7.5 were used in Fig.2. Data from treatments Clay0, Clay1 and Clay2 at pH 7.5 were used in Fig.4.

| Substrate | Treatment | pH<br>(-) | $c_{step}^a$ | $c_{initial}$<br>( $\mu\text{g} \cdot \text{L}^{-1}$ ) |     | $c_{solution}$<br>( $\mu\text{g} \cdot \text{L}^{-1}$ ) |                  | $q_{adsorbed}$<br>( $\mu\text{g} \cdot \text{kg}^{-1}$ ) |                 |
|-----------|-----------|-----------|--------------|--------------------------------------------------------|-----|---------------------------------------------------------|------------------|----------------------------------------------------------|-----------------|
|           |           |           |              | UR                                                     | SRB | UR                                                      | SRB              | UR                                                       | SRB             |
|           |           |           |              |                                                        |     |                                                         |                  |                                                          |                 |
| Sediment  | Clay1     | 7.5       | c1           | 20                                                     | 400 | $13.6 \pm 0.2$                                          | $138.9 \pm 2.5$  | $32 \pm 0.8$                                             | $1308 \pm 12.3$ |
| Sediment  | Clay1     | 7.5       | c2           | 25                                                     | 500 | $18.5 \pm 0.5$                                          | $200.0 \pm 9.3$  | $33 \pm 2.3$                                             | $1503 \pm 46.4$ |
| Sediment  | Clay1     | 7.5       | c3           | 30                                                     | 600 | $22.1 \pm 0.8$                                          | $241.8 \pm 6.3$  | $39 \pm 4.1$                                             | $1794 \pm 31.4$ |
| Sediment  | Clay1     | 7.5       | c4           | 35                                                     | 700 | $26.2 \pm 0.3$                                          | $287.5 \pm 3.4$  | $44 \pm 1.7$                                             | $2066 \pm 16.9$ |
| Sediment  | Clay1     | 7.5       | c5           | 40                                                     | 800 | $30.9 \pm 0.7$                                          | $348.1 \pm 14.6$ | $45 \pm 3.5$                                             | $2264 \pm 72.8$ |
| Sediment  | Clay1     | 7.5       | c6           | 45                                                     | 900 | $36.4 \pm 0.4$                                          | $409.8 \pm 1.0$  | $43 \pm 2.1$                                             | $2455 \pm 4.8$  |
| Sediment  | Clay2     | 7.5       | c1           | 20                                                     | 400 | $3.8 \pm 0.1$                                           | $47.5 \pm 0.9$   | $81 \pm 0.5$                                             | $1767 \pm 4.7$  |
| Sediment  | Clay2     | 7.5       | c2           | 25                                                     | 500 | $5.5 \pm 0.2$                                           | $64.1 \pm 3.1$   | $98 \pm 1.1$                                             | $2184 \pm 15.5$ |
| Sediment  | Clay2     | 7.5       | c3           | 30                                                     | 600 | $8.3 \pm 0.8$                                           | $92.9 \pm 12.3$  | $109 \pm 4.2$                                            | $2541 \pm 61.5$ |
| Sediment  | Clay2     | 7.5       | c4           | 35                                                     | 700 | $10.4 \pm 0.6$                                          | $108.9 \pm 3.5$  | $123 \pm 3.2$                                            | $2962 \pm 17.7$ |
| Sediment  | Clay2     | 7.5       | c5           | 40                                                     | 800 | $13.5 \pm 1.1$                                          | $140.1 \pm 4.8$  | $133 \pm 5.6$                                            | $3307 \pm 23.8$ |
| Sediment  | Clay2     | 7.5       | c6           | 45                                                     | 900 | $16.3 \pm 0.5$                                          | $169.2 \pm 7.4$  | $144 \pm 2.4$                                            | $3662 \pm 37.2$ |

<sup>a</sup> Concentration step of initial tracer addition.

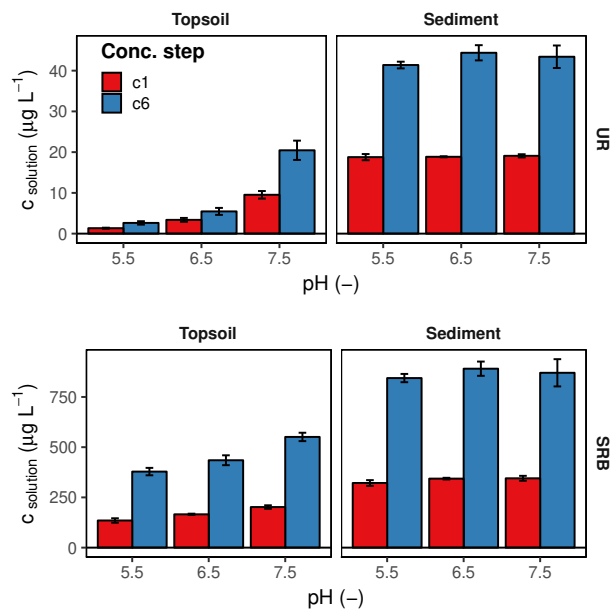

**Figure S1.** Measured concentrations in solution after separation of solid and liquid phase in dependence of pH for the concentration steps 1 and 6 ( $20$  and  $50 \mu\text{g} \cdot \text{L}^{-1}$  for UR and  $400$  and  $1000 \mu\text{g} \cdot \text{L}^{-1}$  for SRB) for topsoil and sediment and the tracers UR and SRB. The error bars represent the standard deviation of three repeated measurements.

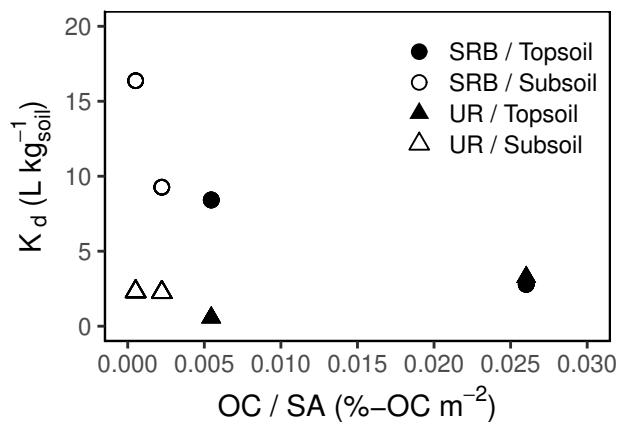

**Figure S2.**  $K_d$ -values as function of OC related to the surface area SA (% – OC · m<sup>-2</sup>) for UR (triangles) and SRB (circles) in topsoil (filled symbols) and subsoil (open symbols). For each tracer and type of substrate (top- or subsoil) the  $K_d$ -value at lower OC-value result from the H<sub>2</sub>O<sub>2</sub>-treatment and the  $K_d$  at higher OC from the untreated samples. Each  $K_d$ -value was derived as the slope from linear regression of the sorption isotherms (six concentrations times three replications).

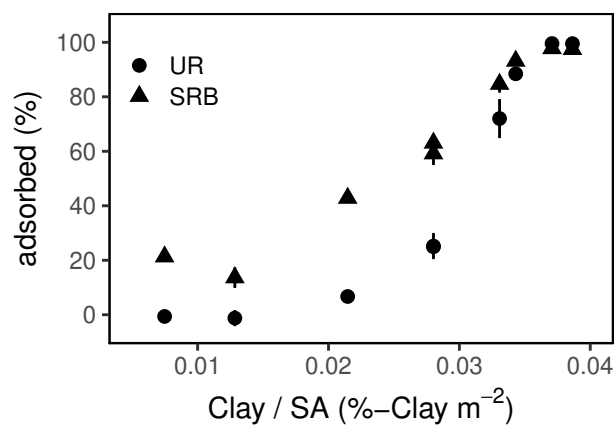

**Figure S3.** Adsorbed percentage as a function of the clay content related to the surface area SA ( $\% - \text{OC} \cdot \text{m}^{-2}$ ) for UR (triangles) and SRB (circles) in the sediment. The data points at 0.14, 1 and 2 % clay- addition contain 18 single measurements consisting of the six tracer concentrations and each in triplicate preparation. The errorbars represent the standard deviation. The other data-points (without errorbars) are single measurements of tracer adsorption at 0.1, 0.5, 2.5, 5.0 and 10.0 % clay- addition.
